# Supplementary material
Source: PubMed Central journal article supplement (PMC1283371)

SSS includes imaginary roots (grey bars)

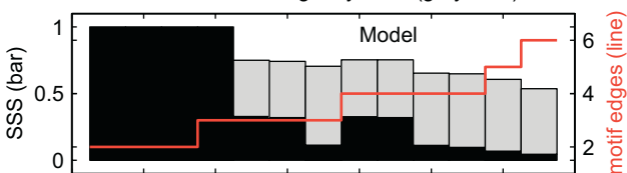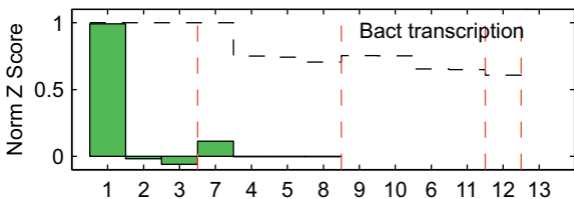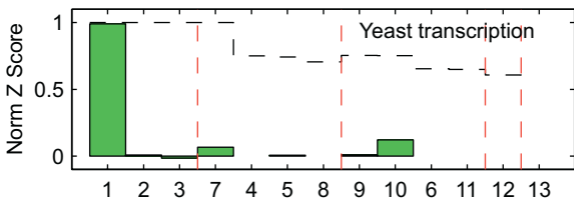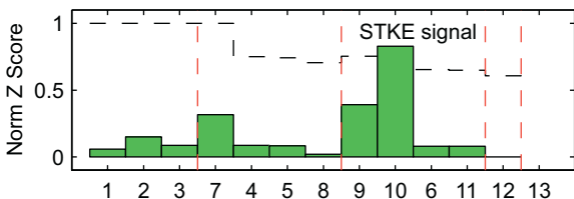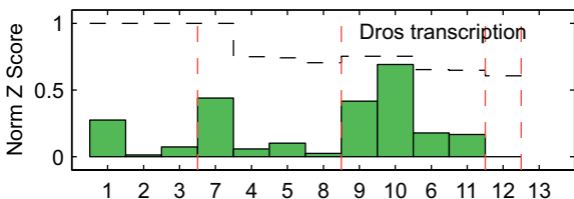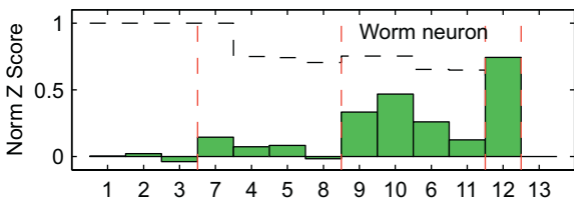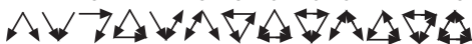

network motif ID

Supplement: pbio.0030343.sg001.pdf [file pbio.0030343.sg001.pdf]

SSS includes imaginary roots (grey bars)

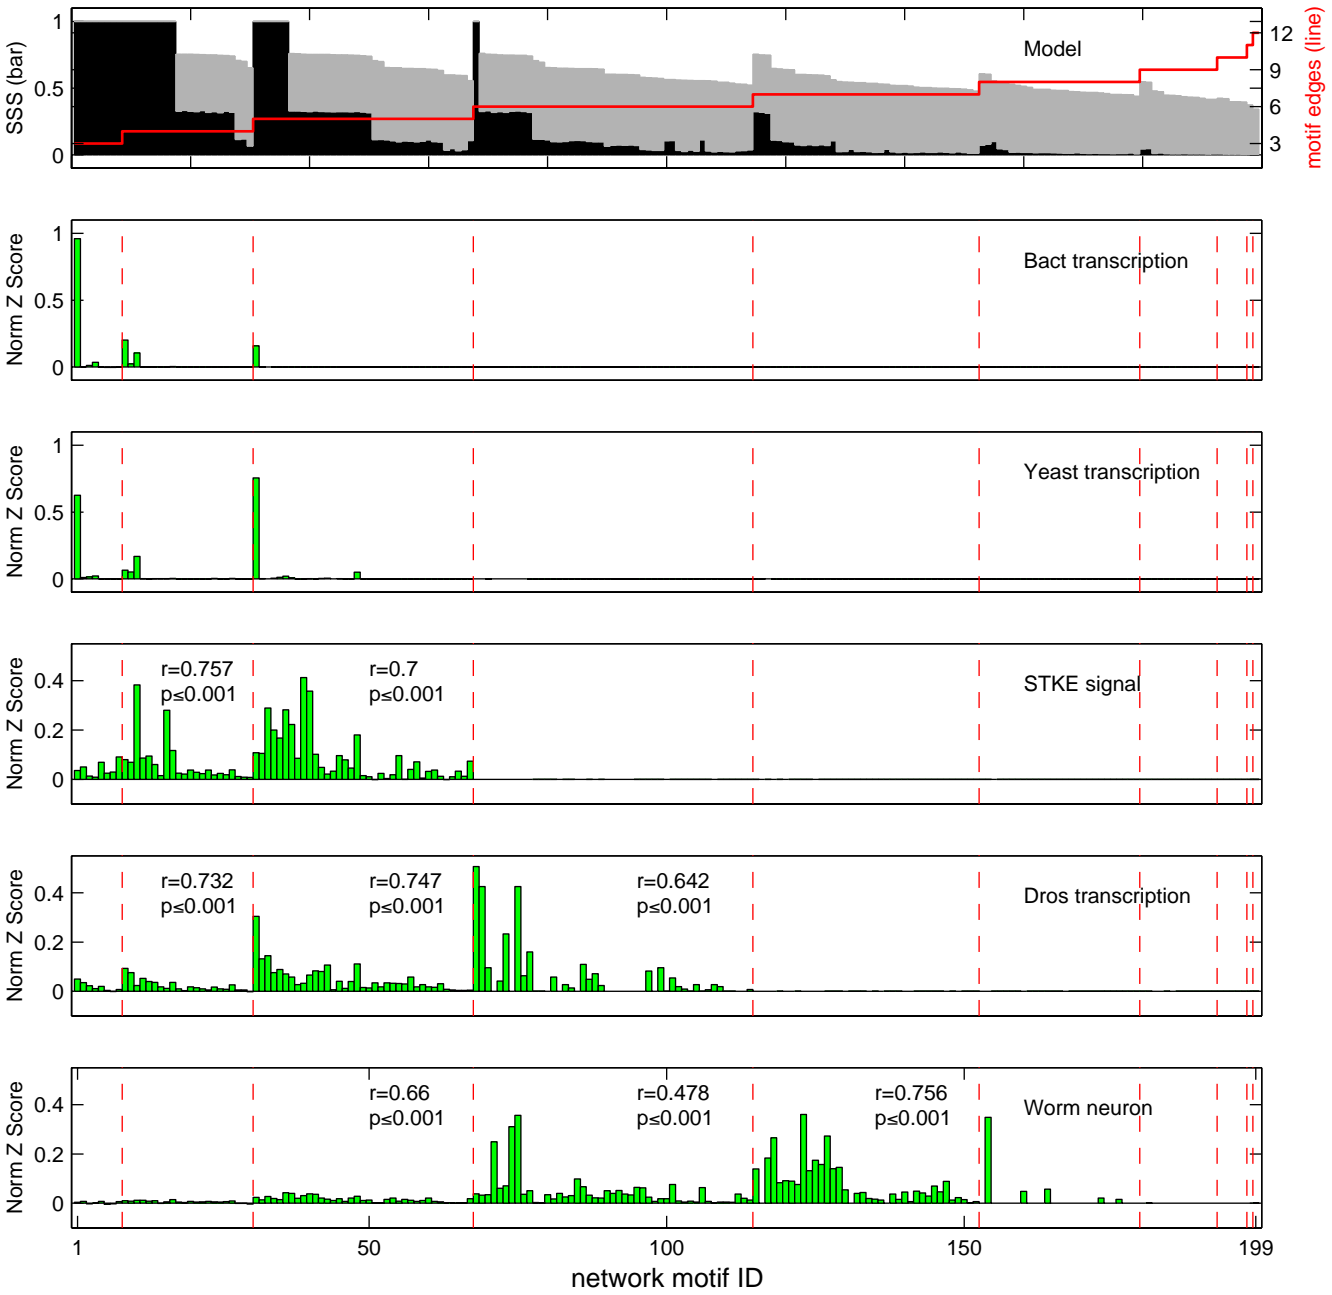

Supplement: pbio.0030343.sg002.pdf [file pbio.0030343.sg002.pdf]

# Degree constrained null model

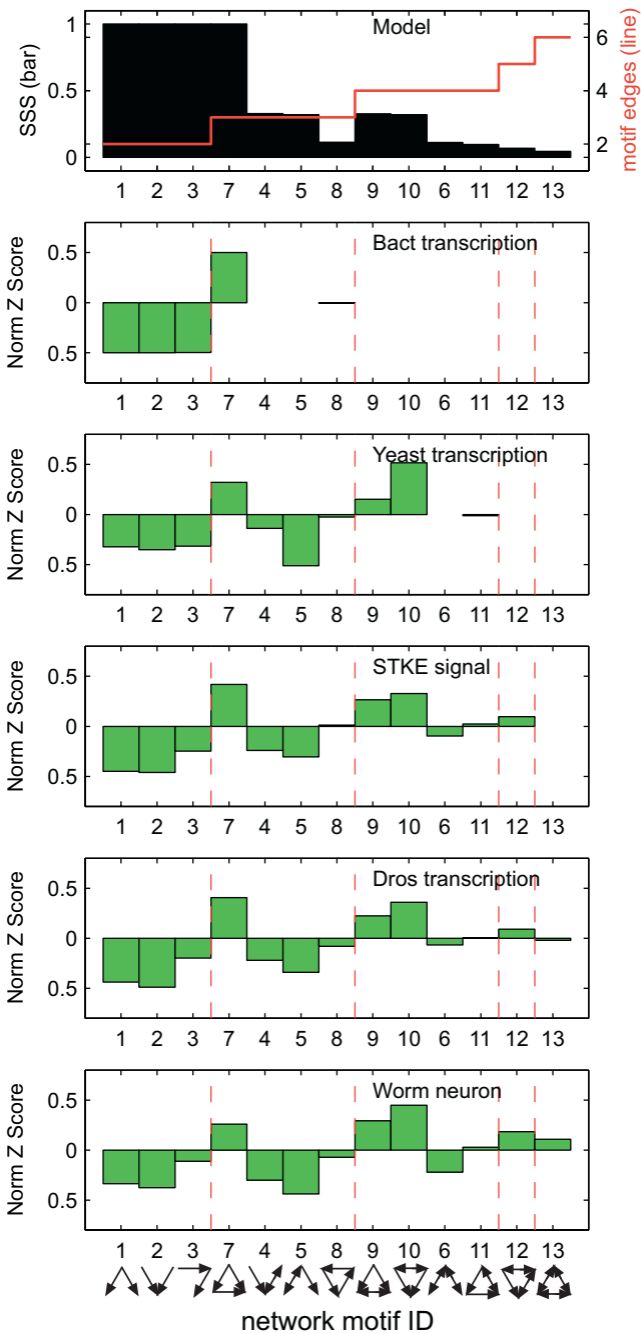

Supplement: pbio.0030343.sg003.pdf [file pbio.0030343.sg003.pdf]

## Degree-constrained null model

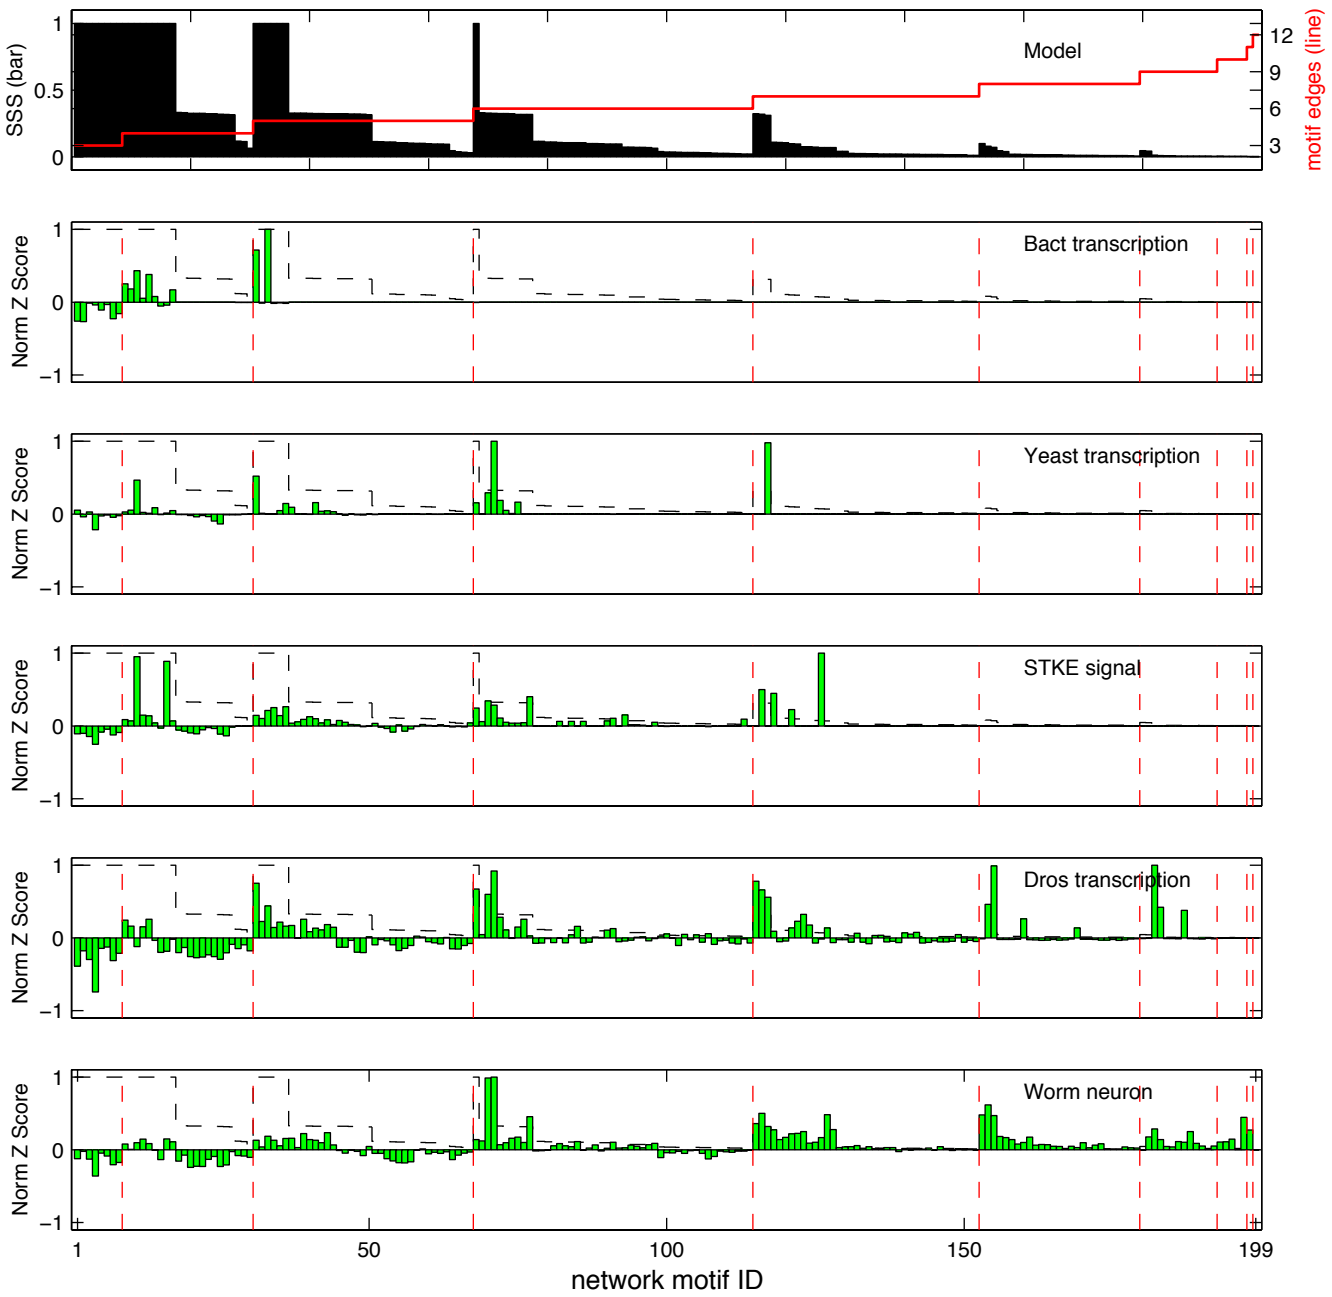

Supplement: pbio.0030343.sg004.pdf [file pbio.0030343.sg004.pdf]

**a**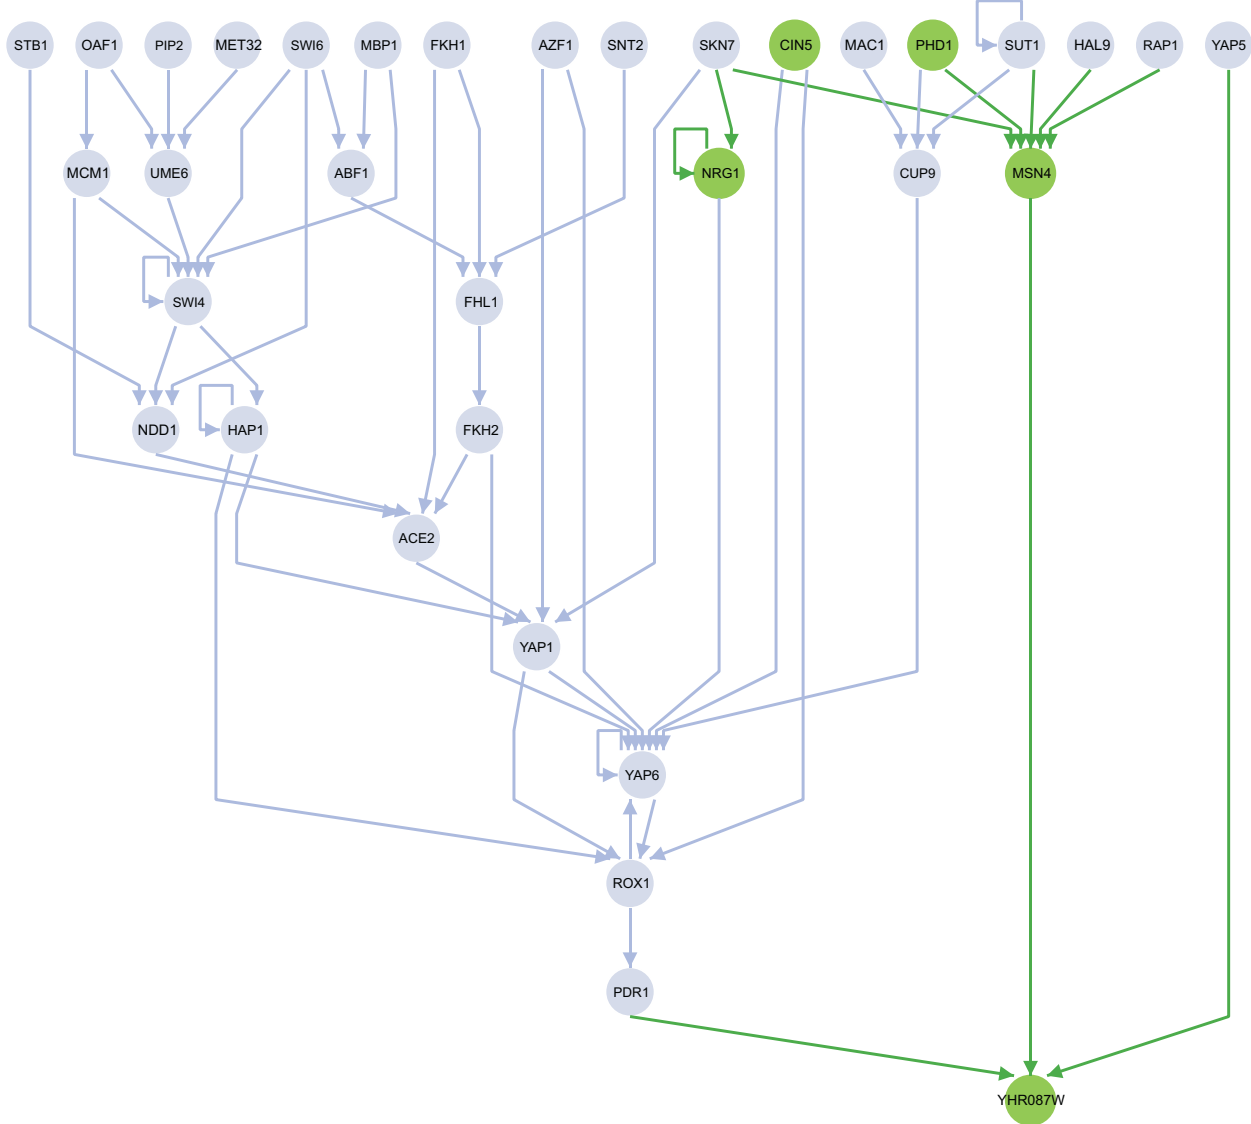**b**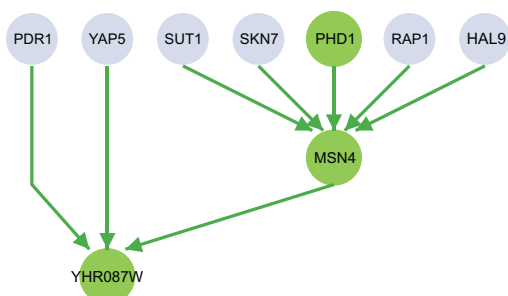**c**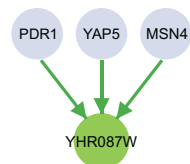

Supplement: pbio.0030343.sg005.pdf [file pbio.0030343.sg005.pdf]
